# Supplementary material
Source: MDPI journal article supplement (https://www.mdpi.com/2673-1592/5/2/33)
Supplement: s1 [file s1]

Archive with 1 entries (1 files):
- prosthesis-2399112-supplementary.pdf
